# Supplementary material for: Gait speed and readmission following hospitalisation for acute exacerbations of COPD: a prospective study
Source: HighWire-hosted journal article supplement (doi:10.1136/thoraxjnl-2015-207046), 2015-08-17

# Gait Speed and Readmission following Hospitalisation for Acute Exacerbations of COPD

## ONLINE DATA SUPPLEMENT

### Authors:

|                                   |                                   |
|-----------------------------------|-----------------------------------|
| Samantha S.C. Kon <sup>1</sup>    | email: s.kon@rbht.nhs.uk          |
| Sarah E. Jones <sup>1</sup>       | email: s.jones5@rbht.nhs.uk       |
| Susie J. Schofield <sup>2</sup>   | email: s.schofield@imperial.ac.uk |
| Mandy J. Dickson RGN <sup>3</sup> | email: mandy.dickson@thh.nhs.uk   |
| Jane L. Canavan <sup>1</sup>      | email: j.canavan@rbht.nhs.uk      |
| Claire M. Nolan <sup>1</sup>      | email: c.nolan@rbht.nhs.uk        |
| Winston Banya <sup>1</sup>        | email: w.banya@rbht.nhs.uk        |
| Brigitte M. Haselden <sup>3</sup> | email: mimi.haselden@thh.nhs.uk   |
| Michael I. Polkey <sup>1</sup>    | email: m.polkey@rbht.nhs.uk       |
| Paul Cullinan PhD <sup>2</sup>    | email: p.cullinan@imperial.ac.uk  |
| William D-C. Man <sup>1</sup>     | email: research@williamman.co.uk  |

### Affiliations:

1. NIHR Respiratory Biomedical Research Unit, Royal Brompton & Harefield NHS Foundation Trust and Imperial College, Harefield Hospital, Hill End Road, Middlesex UB9 6JH, UK
2. Department of Occupational and Environmental Medicine, Imperial College, London, Emmanuel Kaye Building, 1b Manresa Road, London SW3 6LR, UK
3. The Hillingdon Hospital NHS Foundation Trust, Pield Heath Rd, Uxbridge, Middlesex UB8 3NN, UK

### Corresponding Author:

Dr Samantha Kon, Clinical Research Fellow, Department of Respiratory Medicine, Harefield Hospital, Hill End Road, Middlesex, UB9 6JH, United Kingdom, Tel/Fax: +44 (0)1895 828 851, Email: s.kon@rbht.nhs.uk

**Table E1** Other baseline characteristics of the total sample and stratified by quartiles of gait speed. Data expressed as mean (standard deviation) unless otherwise stated.

| Baseline Characteristic                                                            | Total population | Quartiles of gait speed               |                                               |                                               |                                        | p-value |
|------------------------------------------------------------------------------------|------------------|---------------------------------------|-----------------------------------------------|-----------------------------------------------|----------------------------------------|---------|
|                                                                                    |                  | Q1<br><0.40ms <sup>-1</sup><br>(n=54) | Q2<br>0.40-<br>0.59ms <sup>-1</sup><br>(n=53) | Q3<br>0.60-<br>0.79ms <sup>-1</sup><br>(n=54) | Q4<br>≥0.80 ms <sup>-1</sup><br>(n=52) |         |
| Social Deprivation Index                                                           | 21 (10)          | 22 (11)                               | 22 (12)                                       | 21 (9)                                        | 19 (9)                                 | 0.292   |
| Cardiovascular co-morbidity (ischemic heart disease or congestive cardiac failure) | 46 (21.6)        | 14 (27.5)                             | 12 (22.2)                                     | 14 (25.9)                                     | 6 (11.1)                               | 0.161   |
| Long acting muscarinic antagonist (LAMA), n (%)                                    | 166 (77.9)       | 44 (86.3)                             | 39 (72.2)                                     | 45 (83.3)                                     | 38 (70.4)                              | 0.122   |
| Long acting beta 2 agonist (LABA), n (%)                                           | 6 (2.8)          | 2 (3.9)                               | 0 (0)                                         | 3 (5.6)                                       | 1 (1.9)                                | 0.327   |
| Combination LABA / inhaled corticosteroid, n (%)                                   | 120 (56.3)       | 29 (56.9)                             | 32 (59.3)                                     | 30 (55.6)                                     | 29 (53.7)                              | 0.949   |
| Requiring non-invasive ventilation, n (%)                                          | 22 (10.3)        | 7 (13.7)                              | 7 (13.0)                                      | 6 (11.1)                                      | 2 (3.7)                                | 0.304   |
| Requiring intubation and ventilation, n (%)                                        | 2 (0.9)          | 2 (0.9)                               | 0 (0)                                         | 0 (0)                                         | 0 (0)                                  | 0.093   |
| Completed post-hospitalization early pulmonary rehabilitation, n (%)               | 15 (7.0)         | 4 (7.8)                               | 1 (1.9)                                       | 8 (14.8)                                      | 2 (3.7)                                | 0.043   |

**Table E2** Univariable and multivariable logistic regression predicting all cause readmission at 90 days in whole cohort. Data expressed as odds ratio (95% confidence interval).

| n = 213                                   | Univariable analysis |         | Multivariable analysis |         |
|-------------------------------------------|----------------------|---------|------------------------|---------|
|                                           | OR (95% CI)          | p value | OR (95% CI)            | p value |
| Gait speed (quartiles)                    |                      |         |                        |         |
| 1 (median 0.32ms <sup>-1</sup> )          | 7.12 (2.61 to 19.44) | <0.001  | -                      |         |
| 2 (median 0.50 ms <sup>-1</sup> )         | 3.32 (1.18 to 9.32)  |         |                        |         |
| 3 (median 0.69 ms <sup>-1</sup> )         | 1.96 (0.67 to 5.76)  |         |                        |         |
| 4 (median 0.91 ms <sup>-1</sup> )         | 1                    |         |                        |         |
| Gait speed continuous per 0.1 m/s decline | 1.30 (1.14 to 1.48)  | <0.001  | 1.24 (1.05 to 1.46)    | 0.013   |
| Charlson Index                            | 1.63 (1.27 to 2.09)  | <0.001  | 1.55 (1.16 to 2.07)    | 0.003   |
| DECAF <sup>1</sup>                        | 1.60 (1.22 to 2.09)  | 0.001   | -                      |         |
| KATZ index                                | 0.54 (0.37 to 0.78)  | 0.001   | -                      |         |
| One or more admissions (last year)        | 2.70 (1.46 to 5.00)  | 0.002   | 4.44 (2.04 to 9.68)    | <0.001  |
| Age                                       | 1.05 (1.02 to 1.09)  | 0.002   | 1.05 (1.01 to 1.09)    | 0.023   |
| Exacerbations                             | 1.21 (1.07 to 1.37)  | 0.002   | 1.36 (1.15 to 1.59)    | <0.001  |
| Total comorbidities                       | 1.28 (1.09 to 1.51)  | 0.003   | -                      |         |
| Length of stay                            | 1.11 (1.03 to 1.19)  | 0.005   | 1.06 (0.97 to 1.15)    | 0.198   |
| Daily Energy Expenditure                  | 1.00 (0.99 to 1.00)  | 0.057   | -                      |         |
| MRC <sup>2</sup>                          |                      |         |                        |         |
| 1-3                                       | 1                    | 0.062   | -                      |         |
| 4                                         | 1.09 (0.42 to 2.84)  |         |                        |         |
| 5                                         | 2.15 (1.04 to 4.43)  |         |                        |         |
| FEV <sub>1</sub> % pred <sup>3</sup>      | 0.98 (0.97 to 1.00)  | 0.066   | 0.98 (0.96 to 1.00)    | 0.041   |
| BMI <sup>4</sup>                          | 0.97 (0.92 to 1.12)  | 0.227   | -                      |         |
| Lives alone                               | 1.43 (0.78 to 2.62)  | 0.241   | -                      |         |
| SGRQ <sup>5</sup> Total                   | 1.01 (0.99 to 1.03)  | 0.309   | -                      |         |
| Male                                      | 0.81 (0.44 to 1.48)  | 0.490   | -                      |         |

<sup>1</sup> DECAF score = extended MRC Dyspnoea Score, Eosinopenia, Consolidation, Acidaemia, atrial Fibrillation

<sup>2</sup> Medical Research Council Dyspnoea Score

<sup>3</sup> Forced Expiratory Volume in one second

<sup>4</sup> Body mass index

<sup>5</sup> St George's Respiratory Disease Questionnaire

**FIGURE E1** Readmission rates according to quartile of gait speed (n=213). Q1= $<0.40\text{ms}^{-1}$ ; Q2= $0.40\text{-}0.59\text{ms}^{-1}$ ; Q3= $0.60\text{-}0.79\text{ ms}^{-1}$ ; Q4= $\geq 0.80\text{ ms}^{-1}$ . Grey line indicates cumulative hospital bed days in 90-day period after hospital discharge according to gait speed quartiles.

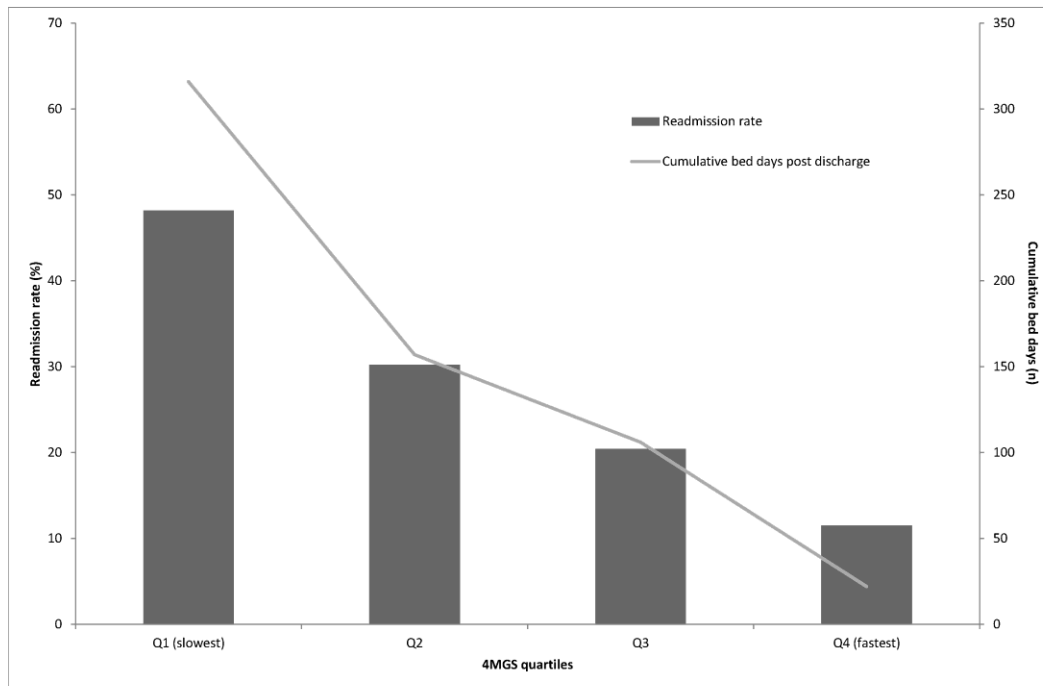

Supplement: thoraxjnl-2015-207046supp.pdf [file thoraxjnl-2015-207046supp.pdf]
